# Supplementary material for: Structure–Activity Relationship Studies Using Natural and Synthetic Okadaic Acid/Dinophysistoxin Toxins
Source: MDPI journal article supplement (doi:10.3390/md14110207), 2016-11-04
Supplement: s1 [file s1]

# Supplementary Materials: Structure-Activity Relationship Studies Using Natural and Synthetic Okadaic Acid/Dinophysistoxin Toxins

Michael J. Twiner, Gregory J. Doucette, Yucheng Pang, Chao Fang, Craig J. Forsyth and Christopher O. Miles

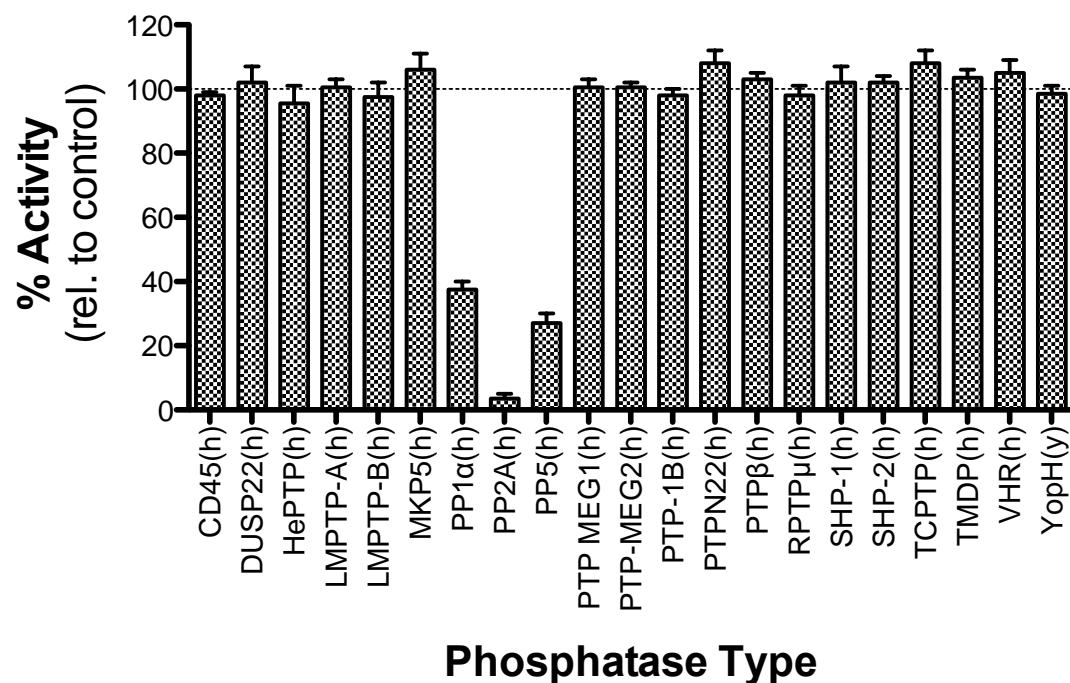

**Figure S1.** Effect of natural DTX-2 on phosphatase activity. As a part of the PhosphataseProfiler™ performed by EMD Millipore Corporation (Darmstadt, Germany), the activities of 21 different protein phosphatases, dual-specificity phosphatases and tyrosine phosphatases were tested in the presence of natural DTX2 (200 nM). All data (mean ± range;  $n = 2$ ) were normalized to the control and illustrated as percent activity.
